# Supplementary material for: Phase-Controlled Cobalt Catalyst Boosting Hydrogenation of 5-Hydroxymethylfurfural to 2,5-Dimethylfuran
Source: MDPI journal article supplement (doi:10.3390/molecules28134918), 2023-06-22
Supplement: s1 [file s1]

Supporting Information

For

Phase-controlled Cobalt Catalyst Boosting  
Hydrogenation of 5-Hydroxymethylfurfural to  
2,5-Dimethylfuran

**Kaixuan Yang <sup>1</sup>, Naimeng Chen <sup>1</sup>, Xiaomiao Guo <sup>2</sup>, Ruoqi Zhang <sup>1</sup>,  
Xiaoyu Sheng <sup>1</sup>, Hui Ge <sup>3,4</sup>, Zhiguo Zhu <sup>1</sup>, Hengquan Yang <sup>2,\*</sup> and Hongying Lü <sup>1,\*</sup>**

<sup>1</sup> Department College of Chemistry and Chemical Engineering, Yantai University, 32 Qingquan Road, Yantai 264005, China; yangkaixuanyt@ytu.edu.cn (K.Y.); 19712025872@s.ytu.edu.cn (X.S.); zhuzg@ytu.edu.cn (Z.Z.)

<sup>2</sup> School of Chemistry and Chemical Engineering, Shanxi University, Taiyuan 030006, China

<sup>3</sup> State Key Laboratory of Coal Conversion, Institute of Coal Chemistry, Chinese Academy of Sciences, Taiyuan 030001, China; gehui@sxicc.ac.cn

<sup>4</sup> University of Chinese Academy of Sciences, Beijing 100049, China

\* Correspondence: hqyang@sxu.edu.cn (H.Y.); hylv@ytu.edu.cn (H.L.)

## Table of contents

**Table S1.** Physicochemical properties of Co based catalysts.

**Table S2.** Fitting parameters in the pseudo-first-order kinetic analysis of the hydrogenation of HMF over HCP-Co and FCC-Co.

**Table S3.** Physicochemical properties of supported Co catalysts.

**Table S4.** The hydrogenolysis performance of HMF to DMF over different catalysts.

**Table S5.** The adsorption energy (eV) of HMF and BHMF on catalysts.

**Table S6.** T Calculated Co-O/C=O bond lengths in all initial, transition, and final states.

**Figure S1.** (a) TEM image and (b) HRTEM image of FCC Co reduced at 873K. The inset image corresponds to FCC Co-associated fast Fourier transformation.

**Figure S2.** (a) HMF conversion and (b) DMF selectivity over various Co catalysts. Reaction conditions: HMF, 0.378 g; catalyst, 0.05 g; 30 mL THF; agitation speed, 1000 rpm; 453 K; 2 MPa.

**Figure S3.** Fitting of the pseudo-first-order kinetic model to the hydrogenation of HMF reaction experimental data collected over (a) HCP-Co and (b) FCC-Co.

**Figure S4.** (a) N<sub>2</sub> adsorption–desorption isotherms, (b) XRD patterns, and (c) enlarged XRD patterns, of HCP-Co/CNTs and FCC-Co/CNTs.

**Figure S5.** Hydrogenation performance of (a) HCP-Co/CNTs and (b) FCC-Co/CNTs. Reaction conditions: HMF, 0.378 g; catalyst, 0.05 g; 30 mL THF; agitation speed, 1000 rpm; 453 K; 2 MPa.

**Figure S6.** Cinnamyl aldehyde conversion over HCP-Co and FCC-Co catalysts.

**Figure S7.** Acetophenone conversion over HCP-Co and FCC-Co catalysts.

**Figure S8.** Styrene conversion over HCP-Co and FCC-Co catalysts.

**Figure S9.** Phenol conversion over HCP-Co and FCC-Co catalysts.

**Figure S10.** Nitrobenzene conversion over HCP-Co and FCC-Co catalysts.

**Table S1.** Physicochemical properties of Co based catalysts.

| Catalysts    | Particle size (nm) <sup>a</sup> |
|--------------|---------------------------------|
| HCP-Co       | 28.2                            |
| FCC-Co       | 32.3                            |
| Spent-HCP-Co | 30.2                            |

<sup>a</sup> calculated by Scherrer equation

**Table S2.** Fitting parameters in the pseudo-first-order kinetic analysis of the hydrogenation of HMF over HCP-Co and FCC-Co.

| Samples | T (K)  | K (min <sup>-1</sup> ) | R <sup>2</sup> <sub>(k)</sub> | Ea (kJ/mol) | R <sup>2</sup> |
|---------|--------|------------------------|-------------------------------|-------------|----------------|
| HCP-Co  | 413.15 | 0.015                  | 0.99                          | 30.8        | 0.99           |
|         | 433.15 | 0.029                  | 0.98                          |             |                |
|         | 453.15 | 0.065                  | 0.99                          |             |                |
|         | 473.15 | 0.093                  | 0.98                          |             |                |
| FCC-Co  | 413.15 | 0.0014                 | 0.99                          | 51.2        | 0.98           |
|         | 433.15 | 0.0022                 | 0.98                          |             |                |
|         | 453.15 | 0.0030                 | 0.99                          |             |                |
|         | 473.15 | 0.0043                 | 0.98                          |             |                |

**Table S3.** Physicochemical properties of supported Co catalysts.

| Entry | Catalyst    | D (nm) | S <sub>BET</sub> (m <sup>2</sup> /g) |
|-------|-------------|--------|--------------------------------------|
| 1     | HCP-Co/CNTs | 20.2   | 133.5                                |
| 2     | FCC-Co/CNTs | 17.3   | 124.5                                |

**Table S4.** The hydrogenolysis performance of HMF to DMF over different catalysts.

| Entry | Catalyst                               | Condition                       | HMF Con.<br>(%) | DMF yield<br>(%) | Ref.      |
|-------|----------------------------------------|---------------------------------|-----------------|------------------|-----------|
| 1     | HCP-Co                                 | 180 °C, 2.0 MPa,<br>2 h, 0.05 g | 100             | 97.7             | This work |
| 2     | Ru/CoFe-LDO                            | 180 °C, 2.0 MPa,<br>2 h,        | 100             | 98.2             | [1]       |
| 3     | PdAu <sub>4</sub> /GC800               | 150 °C, 1.0 MPa,<br>4 h, 0.05 g | 86.8            | 94.4             | [2]       |
| 4     | Ni/C                                   | 180 °C, 4.5 MPa,<br>2 h, 0.05 g | 100             | 75               | [3]       |
| 5     | 7Ni-30W <sub>2</sub> C/AC              | 180 °C, 4.0 MPa,<br>3h, 0.12 g  | 100             | 96               | [4]       |
| 6     | 2%Ni-20%Co/C                           | 130 °C, 1.0 MPa,<br>24h, 0.2 g  | 99              | 95               | [5]       |
| 7     | Cu-Ni/Al <sub>2</sub> O <sub>3</sub>   | 200 °C, 1.0 MPa,<br>24h, 0.5 g  | 99              | 53               | [6]       |
| 8     | Cu-Co/Al <sub>2</sub> O <sub>3</sub>   | 220 °C, 3.0 MPa,<br>8h, 0.5 g   | 100             | 78               | [7]       |
| 9     | Co@Cu/CoAl <sub>2</sub> O <sub>x</sub> | 180 °C, 1.5 MPa,<br>5h, 0.1 g   | 100             | 98.5             | [8]       |

**Table S5.** The adsorption energy (eV) of HMF and BHMF on catalysts.

| FCC-Co (111)  | $E_M$   | $E_{\text{substrate}}$ | $E_{M@\text{substrate}}$ | $E_{\text{ads}}$ |
|---------------|---------|------------------------|--------------------------|------------------|
| HMF           | -302.12 | -95.07                 | -398.36                  | -1.17            |
| HCP-Co (1120) | $E_M$   | $E_{\text{substrate}}$ | $E_{M@\text{substrate}}$ | $E_{\text{ads}}$ |
| HMF           | -602.24 | -95.07                 | -699.02                  | -1.71            |



**Table S6.** Calculated Co-O/C=O bond lengths in all initial, transition, and final states.

| States                | HCP-Co (Å) |              | FCC-Co (Å) |              |
|-----------------------|------------|--------------|------------|--------------|
|                       | C=O (Å)    | C=O---Co (Å) | C=O (Å)    | C=O---Co (Å) |
| Initial state (IS)    | 1.303      | 1.859        | 1.343      | 2.004        |
| Transition state (TS) | 1.315      | 1.864        | 1.384      | 1.881        |
| Final state (FS)      | 1.406      | 1.814        | 1.399      | 1.835        |

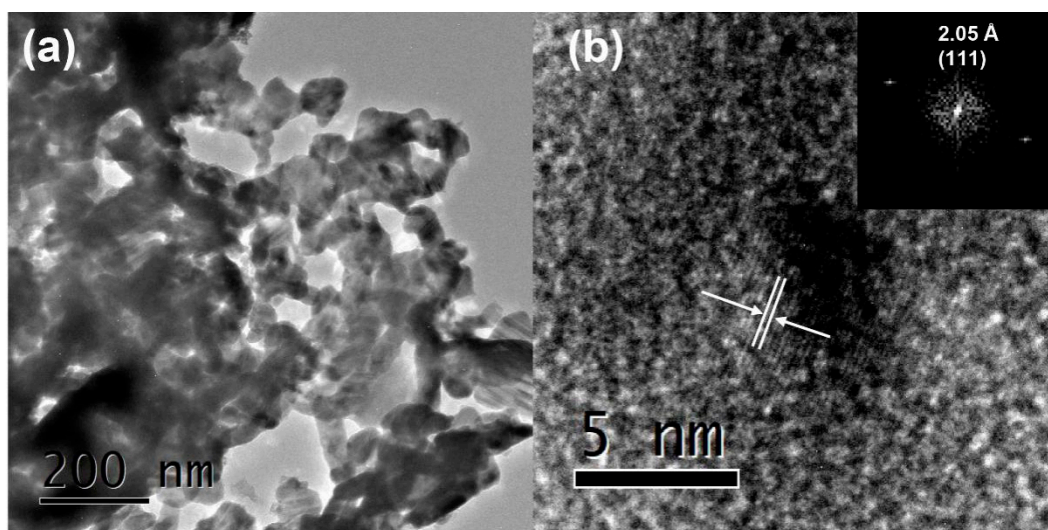

**Figure S1.** (a) TEM image and (b) HRTEM image of FCC Co reduced at 873K. The inset image corresponds to FCC Co-associated fast Fourier transformation.

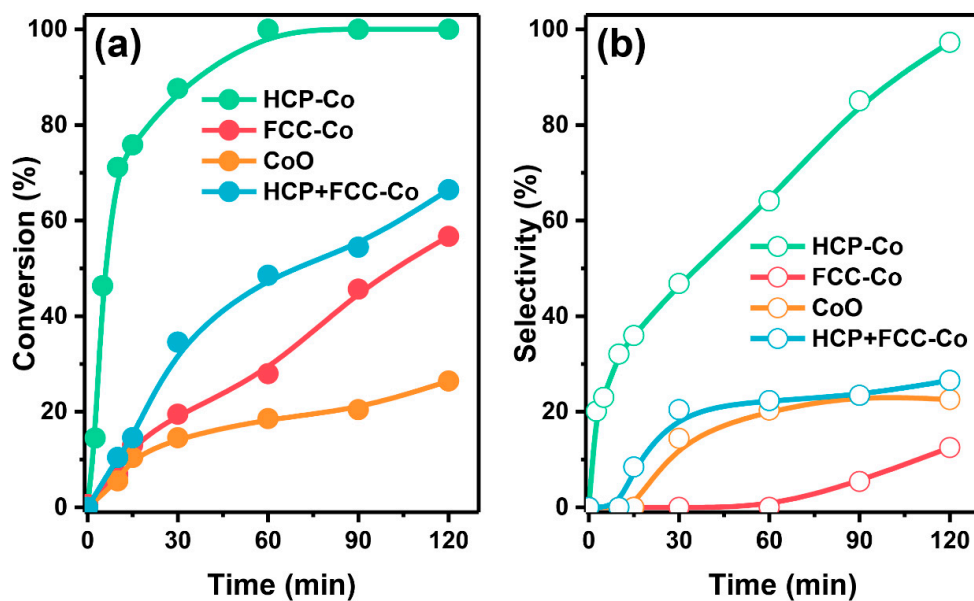

**Figure S2.** (a) HMF conversion and (b) DMF selectivity over various Co catalysts.

Reaction conditions: HMF, 0.378 g; catalyst, 0.05 g; 30 mL THF; agitation speed, 1000 rpm; 453 K; 2 MPa.

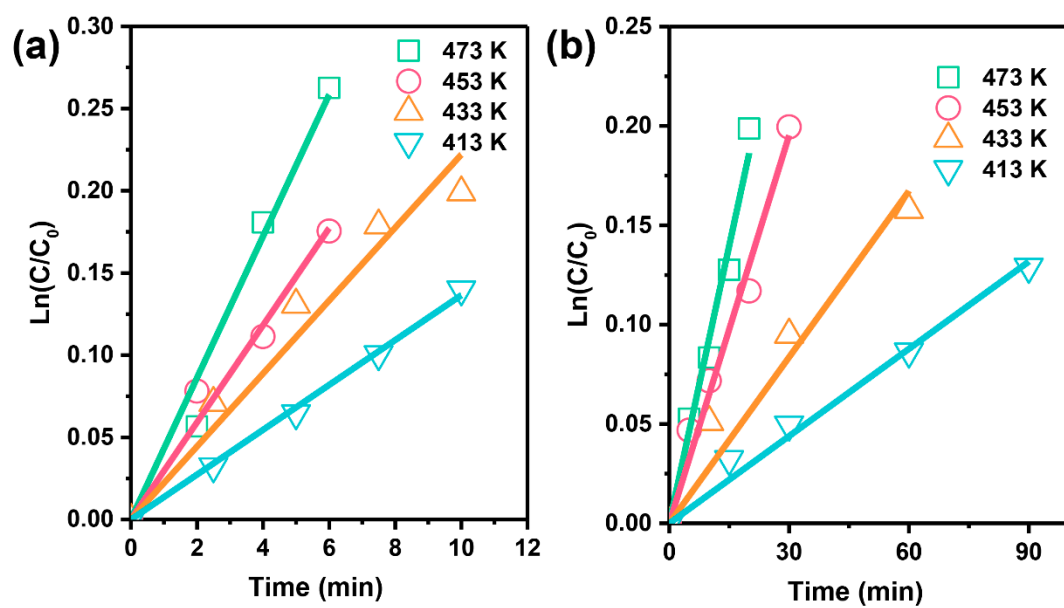

**Figure S3.** Fitting of the pseudo-first-order kinetic model to the hydrogenation of HMF reaction experimental data collected over (a) HCP-Co and (b) FCC-Co.

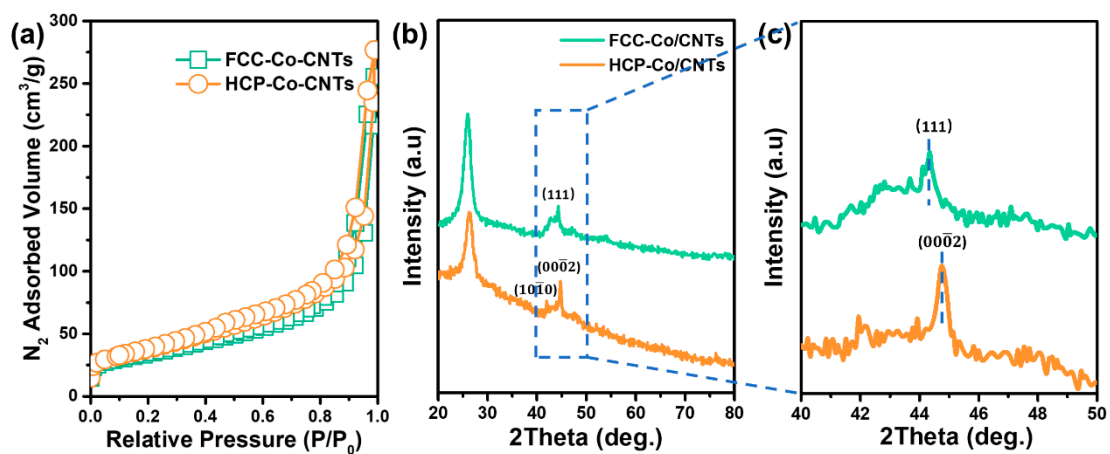

**Figure S4.** (a) N<sub>2</sub> adsorption–desorption isotherms, (b) XRD patterns, and (c) enlarged XRD patterns, of HCP-Co/CNTs and FCC-Co/CNTs.

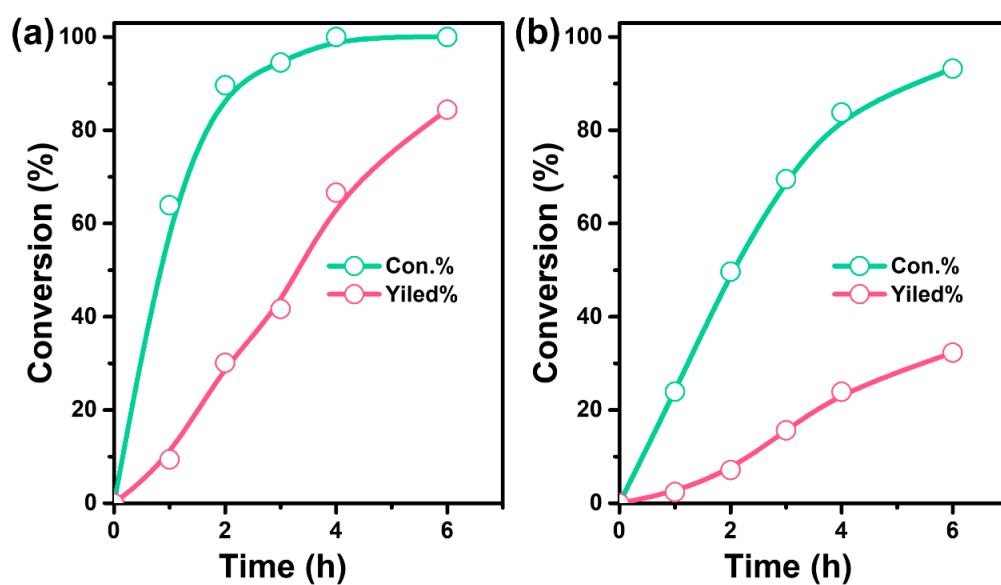

**Figure S5.** Hydrogenation performance of (a) HCP-Co/CNTs and (b) FCC-Co/CNTs.

Reaction conditions: HMF, 0.378 g; catalyst, 0.05 g; 30 mL THF; agitation speed, 1000 rpm; 453 K; 2 MPa.

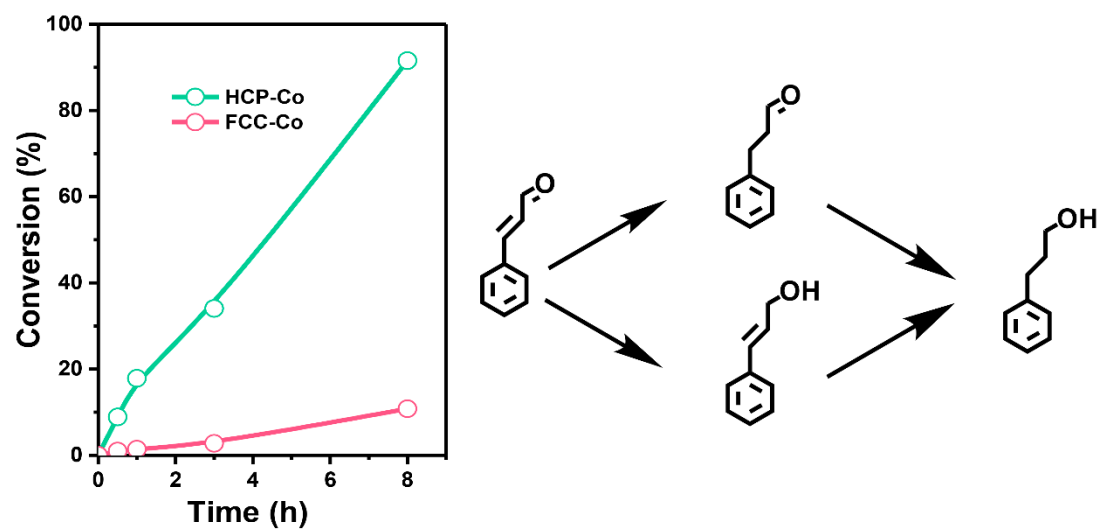

**Figure S6.** Cinnamyl aldehyde conversion over HCP-Co and FCC-Co catalysts.

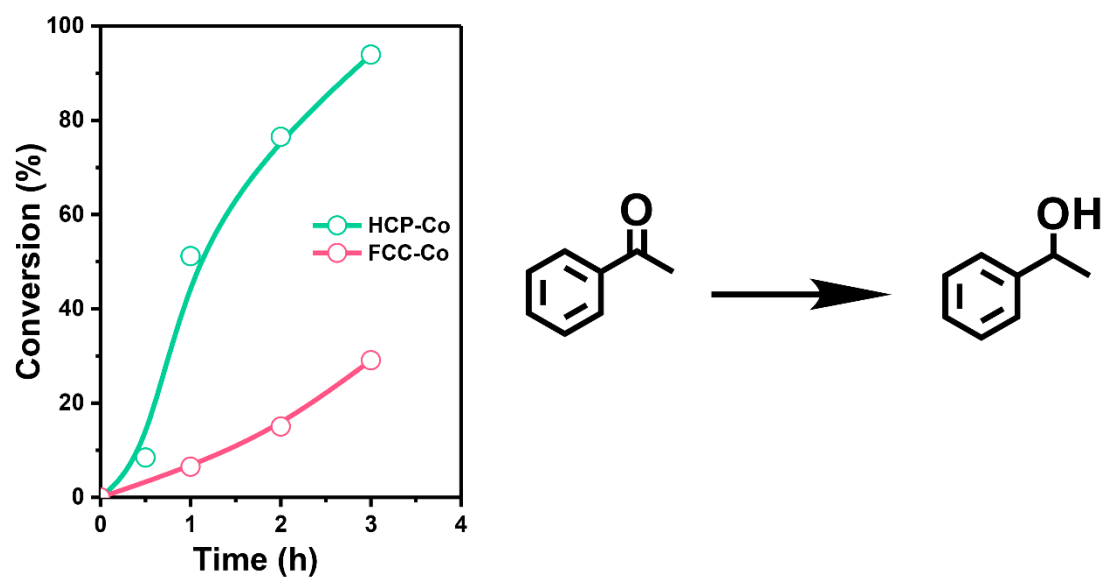

**Figure S7.** Acetophenone conversion over HCP-Co and FCC-Co catalysts.



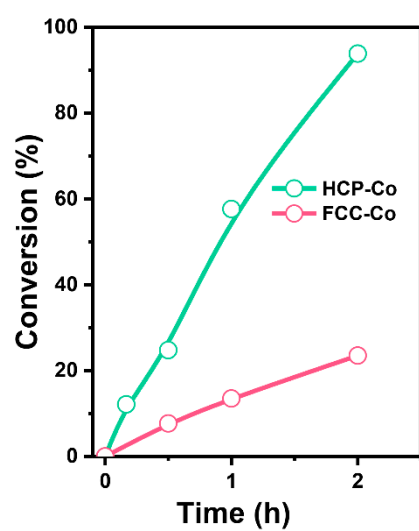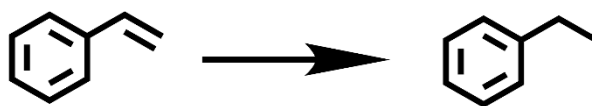

**Figure S8.** Styrene conversion over HCP-Co and FCC-Co catalysts.

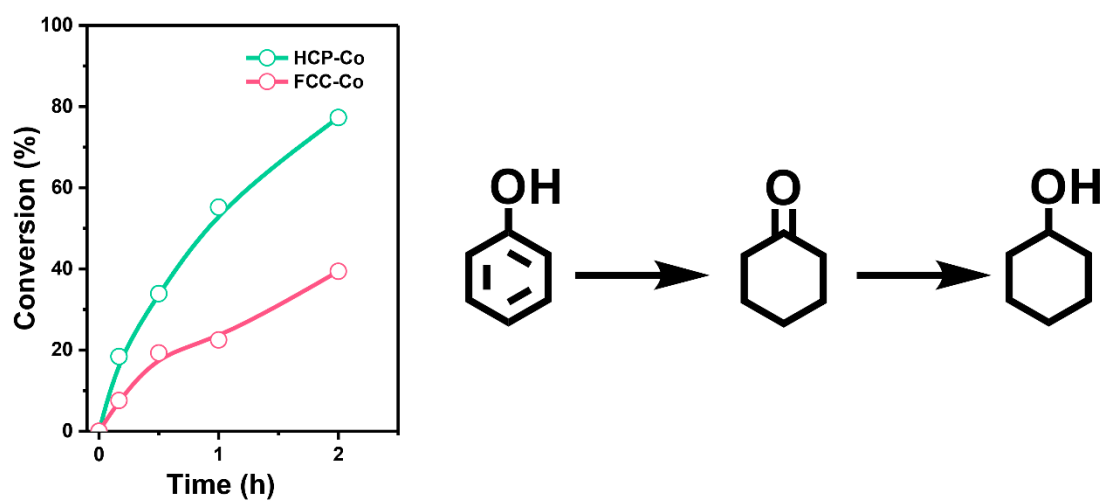

**Figure S9.** Phenol conversion over HCP-Co and FCC-Co catalysts.

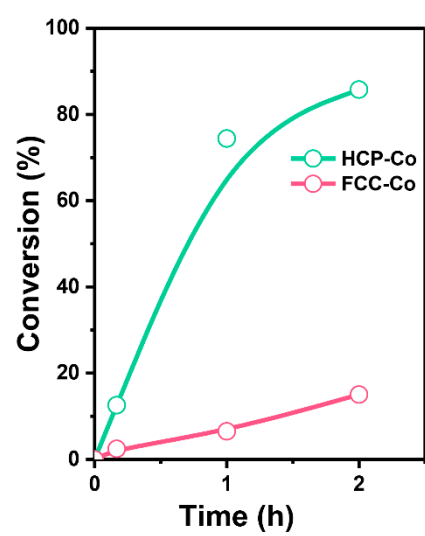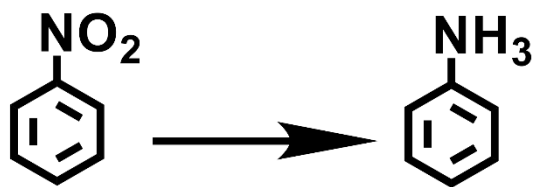

**Figure S10.** Nitrobenzene conversion over HCP-Co and FCC-Co catalysts.

## Reference

1. Li, Q.; Man, P.; Yuan, L.; Zhang, P.; Li, Y.; Ai, S., Ruthenium supported on CoFe layered double oxide for selective hydrogenation of 5-hydroxymethylfurfural. *Mol. Catal.* **2017**, 431, 32-38.
2. Zhang, F.; Liu, Y.; Yuan, F.; Niu, X.; Zhu, Y., Efficient production of the liquid fuel 2,5-dimethylfuran from 5-hydroxymethylfurfural in the absence of acid additive over bimetallic PdAu supported on graphitized carbon. *Energy Fuels* **2017**, 31, 6364-6373.
3. Huang, Y. B.; Chen, M. Y.; Yan, L.; Guo, Q. X.; Fu, Y., Nickel-Tungsten Carbide Catalysts for the Production of 2,5-Dimethylfuran from Biomass- Derived Molecules. *ChemSusChem* **2014**, 7, 1068-1072.
4. Yang, P.; Xia, Q.; Liu, X.; Wang, Y., High-yield production of 2,5-dimethylfuran from 5-hydroxymethylfurfural over carbon supported Ni-Co bimetallic catalyst. *J. Energy Chem.* **2016**, 25, 1015-1020.
5. Srivastava, S.; Jadeja, G. C.; Parikh, J., Influence of supports for selective production of 2,5-dimethylfuran via bimetallic copper-cobalt catalyzed 5-hydroxymethylfurfural hydrogenolysis. *Chin. J. Catal.* **2017**, 38, 699-709.
6. Gyngazova, M. S.; Negahdar, L.; Blumenthal, L. C.; Palkovits, R., Experimental and kinetic analysis of the liquid phase hydrodeoxygenation of 5-hydroxymethylfurfural to 2, 5-dimethylfuran over carbon-supported nickel catalysts. *Chem. Eng. Sci.* **2017**, 173, 455-464.
7. Srivastava, S.; Jadeja, G.; Parikh, J., Synergism studies on alumina-supported copper-nickel catalysts towards furfural and 5-hydroxymethylfurfural hydrogenation. *J. Mol. Catal. A-Chem* **2017**, 426, 244-256.
8. Wang, Q.; Feng, J.; Zheng, L.; Wang, B.; Bi, R.; He, Y.; Liu, H.; Li, D., Interfacial structure-determined reaction pathway and selectivity for 5-(hydroxymethyl) furfural hydrogenation over Cu-based catalysts. *ACS Catal.* **2019**, 10, 1353-1365.
